# Supplementary material for: Genetic Diversity and Connectivity of Ocypode ceratophthalmus in the East and South China Seas and Its Implications for Conservation
Source: MDPI journal article supplement (doi:10.3390/biology12030437), 2023-03-12
Supplement: s1 [file s1]

## Supplementary Information

### Genetic Diversity and Connectivity of *Ocypode ceratophthalmus* in the East and South China Seas and Its implications for conservation

Feng Zhao, Yue Liu , Zihan Wang, Jiaying Lu, Ling Cao, and Cong Zeng \*

School of Oceanography, Shanghai Jiao Tong University, Shanghai 200030, China

\* Correspondence: congzeng@sjtu.edu.cn

**Table S1.** Current status of genetic connectivity between populations in the East China Sea and populations in the South China Sea. The Web of science and CNKI were used to search the published papers. ((genetic OR gene) AND (" East China Sea" AND "South China Sea ")) were used as search keywords for English articles, and ("East China Sea", "South China Sea" and "genetic") (in Chinese) were used as search keywords for Chinese articles. The search deadline was December 29, 2022. Only articles in which the studies species had sampling sites in the East China Sea and the South China Sea were retained. A case was considered to have significant genetic differentiation if there was at least one significant value of the fixation index ( $F_{ST}$ ) between populations in the East China Sea and populations in the South China Sea.

| ID | Species                            | Genetic marker | Genetic differentiation | Number of populations | Reference                                                                                                                                                               |
|----|------------------------------------|----------------|-------------------------|-----------------------|-------------------------------------------------------------------------------------------------------------------------------------------------------------------------|
| 1  | <i>Pampus chinensis</i>            | COI            | Yes                     | 6                     | Population genetic structure and genetic diversity of Chinese pomfret at the coast of the East China Sea and the South China Sea                                        |
| 2  | <i>Pagrus major</i>                | SSR            | Yes                     | 2                     | Genetic Structure of Red Sea Bream ( <i>Pagrus major</i> ) Population off Japan and the Southwest Pacific, Using Microsatellite DNA Markers                             |
| 3  | <i>Eleutheronema tetradactylum</i> | Cytb           | Yes                     | 4                     | Low mtDNA <i>Cytb</i> diversity and shallow population structure of <i>Eleutheronema tetradactylum</i> in the East China Sea and the South China Sea                    |
| 4  | <i>Thamnaconus hypargyreus</i>     | D-Loop         | No                      | 5                     | Shallow mitochondrial phylogeographical pattern and high levels of genetic connectivity of <i>Thamnaconus hypargyreus</i> in the South China Sea and the East China Sea |
| 5  | <i>Eleutheronema rhadinum</i>      | COI            | No                      | 2                     | Genetic diversity and population structure of <i>Eleutheronema rhadinum</i> in the East and South China Seas revealed in mitochondrial COI sequences                    |
| 6  | <i>Nibea albiflora</i>             | COI            | No                      | 3                     | Genetic diversity and population structure of <i>Nibea albiflora</i> in the                                                                                             |

|    |                                |               |     |    |                                                                                                                                                                                              |
|----|--------------------------------|---------------|-----|----|----------------------------------------------------------------------------------------------------------------------------------------------------------------------------------------------|
| 7  | <i>Epinephelus akaara</i>      | D-Loop        | Yes | 6  | China Sea revealed by mitochondrial COI sequences<br>Genetic population structuring and demographic history of red spotted grouper ( <i>Epinephelus akaara</i> ) in South and East China Sea |
| 8  | <i>Scomber japonicus</i>       | SSR           | Yes | 6  | Microsatellite analysis reveals the population structure and migration patterns of <i>Scomber japonicus</i> (Scombridae) with continuous distribution in the East and South China Seas       |
| 9  | <i>Chelon haematocheilus</i>   | D-Loop        | Yes | 3  | Pleistocene isolation in the North-western Pacific marginal seas and limited dispersal in a marine fish, <i>Chelon haematocheilus</i> (Temminck & Schlegel, 1845)                            |
| 10 | <i>Eriocheir sensu stricto</i> | AFLP          | Yes | 7  | Genome scan of the mitten crab <i>Eriocheir sensu stricto</i> in East Asia: Population differentiation, hybridization and adaptive speciation                                                |
| 11 | <i>Portunus sanguinolentus</i> | D-Loop        | Yes | 6  | Phylogeography and Genetic Structure of the Swimming Crabs <i>Portunus sanguinolentus</i> (Herbst, 1783) in East Asia                                                                        |
| 12 | <i>Scylla paramamosain</i>     | COI+16S rDNA  | Yes | 10 | Late Pleistocene population expansion of <i>Scylla paramamosain</i> along the coast of China: A population dynamic response to the Last Interglacial sea level highstand                     |
| 13 | <i>Liza affinis</i>            | SSR           | Yes | 8  | Population Genetic Structure of <i>Liza affinis</i> (Eastern Keelback Mullet), Reveals High Gene Flow Inferred from Microsatellite Analysis                                                  |
| 14 | <i>Periophthalmus modestus</i> | ND5           | No  | 5  | Biogeographical role of the Kuroshio Current in the amphibious mudskipper <i>Periophthalmus modestus</i> indicated by mitochondrial DNA data                                                 |
| 15 | <i>Platypleura hilpa</i>       | COI+COII+Cytb | Yes | 24 | Phylogeography of the cicada <i>Platypleura hilpa</i> in subtropical and tropical East Asia based on mitochondrial and nuclear genes and microsatellite markers                              |
| 16 | <i>Atrina pectinata</i>        | COI           | No  | 10 | Population genetic structure of the pen shell <i>Atrina pectinata</i> sensu lato (Bivalvia: Pinnidae) throughout East Asia                                                                   |
| 17 | <i>Siphonaria japonica</i>     | COI           | No  | 5  | Causations of phylogeographic barrier of some rocky shore species along the Chinese coastline                                                                                                |
| 18 | <i>Siphonaria japonica</i>     | ITS           | No  | 5  | Causations of phylogeographic barrier of some rocky shore species along the Chinese coastline                                                                                                |

|    |                                   |                |     |    |                                                                                                                                                        |
|----|-----------------------------------|----------------|-----|----|--------------------------------------------------------------------------------------------------------------------------------------------------------|
| 19 | <i>Macrobrachium nipponense</i>   | COI+16S rRNA   | Yes | 6  | Phylogeography and genetic structure of the oriental river prawn <i>Macrobrachium nipponense</i> (Crustacea: Decapoda: Palaemonidae) in East Asia      |
| 20 | <i>Cyclina sinensis</i>           | COI            | Yes | 9  | Phylogeography of Bivalve <i>Cyclina sinensis</i> : Testing the Historical Glaciations and Changjiang River Outflow Hypotheses in Northwestern Pacific |
| 21 | <i>Cyclina sinensis</i>           | ITS-1          | Yes | 9  | Phylogeography of Bivalve <i>Cyclina sinensis</i> : Testing the Historical Glaciations and Changjiang River Outflow Hypotheses in Northwestern Pacific |
| 22 | <i>Tachypleus tridentatus</i>     | AT-rich region | Yes | 8  | Phylogeography, Demographic History, and Reserves Network of Horseshoe Crab, <i>Tachypleus tridentatus</i> , in the South and East China Sea-boards    |
| 23 | <i>Penaeus japonicus</i>          | COI            | Yes | 5  | Molecular population structure of the kuruma shrimp <i>Penaeus japonicus</i> species complex in western Pacific                                        |
| 24 | <i>Penaeus japonicus</i>          | D-Loop         | Yes | 5  | Molecular population structure of the kuruma shrimp <i>Penaeus japonicus</i> species complex in western Pacific                                        |
| 25 | <i>Penaeus japonicus</i>          | SSR            | No  | 5  | Molecular population structure of the kuruma shrimp <i>Penaeus japonicus</i> species complex in western Pacific                                        |
| 26 | <i>Eleutheronema rhadinum</i>     | COI            | Yes | 4  | Population genetic characteristics of <i>Eleutheronema rhadinum</i> and <i>Eleutheronema tetradactylus</i> in China (in Chinese)                       |
| 27 | <i>Eleutheronema rhadinum</i>     | D-Loop         | Yes | 4  | Population genetic characteristics of <i>Eleutheronema rhadinum</i> and <i>Eleutheronema tetradactylus</i> in China (in Chinese)                       |
| 28 | <i>Arcotheres sinensis</i>        | COI            | Yes | 4  | Morphological variation and population genetic structure of the crab <i>Arcotheres sinensis</i> from coastal China (in Chinese)                        |
| 29 | <i>Parasesarma affinis</i>        | COI            | No  | 12 | Studies on molecular phylogeny of sesarmid crabs from the coast of China and molecular phylogeography of two mangrove crabs (in Chinese)               |
| 30 | <i>Octopus ovulum</i>             | Cyt b          | No  | 4  | Analysis of genetic diversity and structure of octopuses (in Chinese)                                                                                  |
| 31 | <i>Sthenoteuthis oualaniensis</i> | Cytb           | Yes | 2  | Genetic structure of <i>Sthenoteuthis oualaniensis</i> population in the north-west Pacific ocean (in Chinese)                                         |
| 32 | <i>Pagrus major</i>               | D-Loop         | Yes | 9  | Genetic diversity of 3 sparid species in coastal waters of China based on                                                                              |

|    |                                |             |     |    |  |                                                                                                                                                                                                                           |
|----|--------------------------------|-------------|-----|----|--|---------------------------------------------------------------------------------------------------------------------------------------------------------------------------------------------------------------------------|
|    |                                |             |     |    |  | mitochondrial control region sequences (in Chinese)                                                                                                                                                                       |
| 33 | <i>Acanthopagrus schlegeli</i> | D-Loop      | Yes | 11 |  | Genetic diversity of 3 sparid species in coastal waters of China based on mitochondrial control region sequences (in Chinese)                                                                                             |
| 34 | <i>Rhabdosargus sarba</i>      | D-Loop      | Yes | 6  |  | Genetic diversity of 3 sparid species in coastal waters of China based on mitochondrial control region sequences (in Chinese)                                                                                             |
| 35 | <i>Ilisha elongata</i>         | D-Loop      | Yes | 8  |  | Population genetics of the <i>Ilisha elongata</i> (Clupeiformes: Pristigasteridae) along the Northwestern Pacific coast and the development of SNP marker for <i>Ilisha elongata</i> and <i>coilia nusus</i> (in Chinese) |
| 36 | <i>Oratosquilla oratoria</i>   | ND5+COI+COB | Yes | 6  |  | Phylogeography of Manatosquilla shrimp populations and molecular phylogeny of Sternoporus in the coastal mouth of China (in Chinese)                                                                                      |
| 37 | <i>Pampus chinensis</i>        | D-Loop      | No  | 2  |  | Studies on Morphology and genetics of Pampus species (in Chinese)                                                                                                                                                         |
| 38 | <i>Pampus minor</i>            | D-Loop      | Yes | 2  |  | Studies on Morphology and genetics of Pampus species (in Chinese)                                                                                                                                                         |
| 39 | <i>Cyclina sinensis</i>        | COI         | Yes | 9  |  | Phylogeography of four marine bivalves along China' coastline, with views into the evolutionary processes and mechanisms (in Chinese)                                                                                     |
| 40 | <i>Tegillarca granosa</i>      | COI         | Yes | 9  |  | Phylogeography of four marine bivalves along China' coastline, with views into the evolutionary processes and mechanisms (in Chinese)                                                                                     |
| 41 | <i>Scomber japonicus</i>       | D-Loop      | No  | 5  |  | Molecular phylogeography of two scomber species in Northwestern Pacific (in Chinese)                                                                                                                                      |
| 42 | <i>Scomber japonicus</i>       | SSR         | Yes | 5  |  | Molecular phylogeography of two scomber species in Northwestern Pacific (in Chinese)                                                                                                                                      |
| 43 | <i>Konosirus punctatus</i>     | D-Loop+COI  | Yes | 3  |  | Population genetic structure and molecular phylogeography of <i>Konosirus punctatus</i> and <i>Sardinella zunasi</i> (in Chinese)                                                                                         |
| 44 | <i>Konosirus punctatus</i>     | AFLP        | Yes | 3  |  | Causations of phylogeographic barrier of some rocky shore species along the Chinese coastline                                                                                                                             |
| 45 | <i>Konosirus punctatus</i>     | ISSR        | Yes | 2  |  | Causations of phylogeographic barrier of some rocky shore species along the Chinese coastline                                                                                                                             |

**Table S2.** The information of carapace width, carapace length, abdomen width, abdomen length, weight and gender.

| Population | Carapace width (cm) | Carapace length (cm) | Abdomen width (cm) | Abdomen length (cm) | Weight (g)   | Female: Male |
|------------|---------------------|----------------------|--------------------|---------------------|--------------|--------------|
| MA         | 2.04 ± 0.36         | 1.71 ± 0.34          | 0.67 ± 0.24        | 1.41 ± 0.32         | 5.41 ± 2.25  | 5:10         |
| CW         | 3.09 ± 0.34         | 2.64 ± 0.23          | 1.44 ± 0.47        | 2.31 ± 0.26         | 16.59 ± 5.40 | 17:7         |
| DT         | 3.23 ± 0.35         | 2.72 ± 0.37          | 1.38 ± 0.55        | 2.44 ± 0.37         | 18.06 ± 6.17 | 14:6         |
| DZG        | 1.99 ± 0.29         | 1.72 ± 0.27          | 0.65 ± 0.21        | 1.40 ± 0.29         | 5.28 ± 2.51  | 7:14         |
| MZD        | 2.94 ± 0.20         | 2.47 ± 0.21          | 1.16 ± 0.38        | 2.18 ± 0.19         | 13.38 ± 2.66 | 9:7          |
| QA         | 2.94 ± 0.26         | 2.44 ± 0.24          | 1.22 ± 0.49        | 2.11 ± 0.23         | 15.01 ± 3.54 | 15:7         |
| NJLD       | 3.11 ± 0.40         | 2.65 ± 0.36          | 1.42 ± 0.49        | 2.39 ± 0.47         | 16.15 ± 6.95 | 8:2          |
| PT         | 2.95 ± 0.35         | 2.45 ± 0.30          | 1.19 ± 0.51        | 2.14 ± 0.31         | 13.68 ± 4.54 | 10:8         |
| ZJS        | 3.40 ± 0.29         | 2.86 ± 0.35          | 1.48 ± 0.51        | 2.57 ± 0.34         | 22.82 ± 7.11 | 9:5          |
| DH         | 3.07 ± 0.27         | 2.49 ± 0.25          | 1.10 ± 0.61        | 2.27 ± 0.30         | 14.43 ± 4.56 | 7:8          |
| SYH        | 2.21 ± 0.32         | 1.93 ± 0.26          | 0.81 ± 0.36        | 1.67 ± 0.31         | 5.54 ± 2.50  | 5:10         |
| XM         | 3.06 ± 0.32         | 2.58 ± 0.28          | 1.31 ± 0.47        | 2.26 ± 0.33         | 16.65 ± 5.72 | 13:5         |
| FYLD       |                     |                      |                    |                     | 16.07 ± 3.32 | 7:8          |
| HA         |                     |                      |                    |                     | 13.42 ± 2.33 | 8:7          |
| JH         |                     |                      |                    |                     | 14.03 ± 2.41 | 2:3          |

**Table S3.** Pairwise  $F_{ST}$  values between populations based on *COI* sequences. All pairwise  $F_{ST}$  values between populations were not statistically significant ( $p > 0.05$ ).

|      | JH      | PT      | ZJS     | SYH     | MA      | HA      | XM      | CW      | DT      | FYLD    | DH      | DZG     | MZD     | QA      | NJLD   |
|------|---------|---------|---------|---------|---------|---------|---------|---------|---------|---------|---------|---------|---------|---------|--------|
| JH   | 0.0000  |         |         |         |         |         |         |         |         |         |         |         |         |         |        |
| PT   | 0.0054  | 0.0000  |         |         |         |         |         |         |         |         |         |         |         |         |        |
| ZJS  | -0.0370 | -0.0328 | 0.0000  |         |         |         |         |         |         |         |         |         |         |         |        |
| SYH  | -0.0134 | 0.0025  | -0.0124 | 0.0000  |         |         |         |         |         |         |         |         |         |         |        |
| MA   | -0.0147 | 0.0070  | -0.0273 | 0.0177  | 0.0000  |         |         |         |         |         |         |         |         |         |        |
| HA   | -0.0412 | 0.0068  | -0.0308 | -0.0116 | -0.0129 | 0.0000  |         |         |         |         |         |         |         |         |        |
| XM   | 0.0358  | 0.0138  | 0.0162  | 0.0602  | -0.0003 | 0.0321  | 0.0000  |         |         |         |         |         |         |         |        |
| CW   | -0.0039 | 0.0040  | -0.0249 | 0.0433  | -0.0315 | -0.0018 | 0.0107  | 0.0000  |         |         |         |         |         |         |        |
| DT   | -0.0232 | 0.0094  | -0.0290 | 0.0170  | -0.0327 | -0.0054 | 0.0087  | -0.0133 | 0.0000  |         |         |         |         |         |        |
| FYLD | -0.0131 | 0.0076  | -0.0170 | 0.0329  | -0.0163 | 0.0124  | 0.0229  | -0.0123 | -0.0091 | 0.0000  |         |         |         |         |        |
| DH   | 0.0065  | 0.0115  | -0.0168 | 0.0234  | -0.0402 | 0.0063  | -0.0213 | -0.0149 | -0.0269 | 0.0066  | 0.0000  |         |         |         |        |
| DZG  | -0.0190 | -0.0106 | -0.0353 | 0.0105  | -0.0076 | -0.0047 | 0.0507  | -0.0134 | 0.0007  | -0.0247 | 0.0239  | 0.0000  |         |         |        |
| MZD  | -0.0275 | 0.0062  | -0.0212 | 0.0109  | 0.0065  | -0.0182 | 0.0526  | 0.0025  | 0.0038  | -0.0188 | 0.0345  | -0.0201 | 0.0000  |         |        |
| QA   | -0.0240 | -0.0034 | -0.0400 | 0.0119  | -0.0230 | -0.0146 | 0.0261  | -0.0192 | -0.0310 | -0.0066 | -0.0131 | -0.0143 | -0.0122 | 0.0000  |        |
| NJLD | -0.0116 | -0.0456 | -0.0406 | -0.0130 | 0.0033  | -0.0087 | 0.0181  | -0.0013 | 0.0041  | -0.0245 | 0.0152  | -0.0393 | -0.0359 | -0.0111 | 0.0000 |

**Table S4.** Pairwise  $F_{ST}$  values between populations based on *D-Loop* sequences. The genetic differentiation between the remaining populations showed insignificant differences ( $p > 0.05$ ), except for the significant differences between MZD and FYLD, and between MZD and HA populations ( $p < 0.05$ ).

|      | MA      | DT      | FYLD    | MZD     | NJLD    | PT      | ZJS     | HA      | XM      | CW      | QA      | DH      | JH      | DZG    | SYH    |
|------|---------|---------|---------|---------|---------|---------|---------|---------|---------|---------|---------|---------|---------|--------|--------|
| MA   | 0.0000  |         |         |         |         |         |         |         |         |         |         |         |         |        |        |
| DT   | -0.0417 | 0.0000  |         |         |         |         |         |         |         |         |         |         |         |        |        |
| FYLD | -0.0651 | 0.0139  | 0.0000  |         |         |         |         |         |         |         |         |         |         |        |        |
| MZD  | 0.0519  | 0.0704  | 0.1889  | 0.0000  |         |         |         |         |         |         |         |         |         |        |        |
| NJLD | -0.0482 | -0.0933 | 0.0172  | 0.0110  | 0.0000  |         |         |         |         |         |         |         |         |        |        |
| PT   | -0.0359 | -0.0330 | 0.0906  | -0.0284 | -0.0688 | 0.0000  |         |         |         |         |         |         |         |        |        |
| ZJS  | -0.0547 | -0.0290 | 0.0259  | -0.0155 | 0.0625  | -0.0260 | 0.0000  |         |         |         |         |         |         |        |        |
| HA   | -0.0436 | 0.0488  | -0.0716 | 0.2675  | 0.0552  | 0.1571  | 0.0640  | 0.0000  |         |         |         |         |         |        |        |
| XM   | -0.0214 | -0.0298 | 0.0490  | -0.0477 | -0.0699 | -0.0451 | -0.0571 | 0.1024  | 0.0000  |         |         |         |         |        |        |
| CW   | -0.0692 | -0.0684 | -0.0479 | 0.1071  | -0.0672 | 0.0219  | -0.0161 | -0.0460 | -0.0023 | 0.0000  |         |         |         |        |        |
| QA   | -0.0325 | -0.0591 | 0.0200  | 0.1287  | -0.0213 | 0.0129  | -0.0107 | 0.0286  | 0.0295  | -0.0397 | 0.0000  |         |         |        |        |
| DH   | -0.0974 | 0.0121  | -0.0628 | 0.0725  | -0.0135 | 0.0386  | -0.0619 | -0.0286 | -0.0013 | -0.0386 | -0.0489 | 0.0000  |         |        |        |
| JH   | -0.0838 | -0.0327 | 0.0351  | -0.0541 | -0.0918 | -0.0910 | -0.0514 | 0.0603  | -0.0425 | -0.0276 | -0.0102 | -0.0480 | 0.0000  |        |        |
| DZG  | -0.0988 | -0.0797 | -0.0705 | 0.1537  | -0.0397 | 0.0451  | -0.0386 | -0.0709 | -0.0012 | -0.1128 | -0.0739 | -0.0602 | -0.0143 | 0.0000 |        |
| SYH  | -0.0247 | -0.0422 | 0.1111  | -0.0545 | -0.0350 | -0.0737 | -0.0524 | 0.1410  | -0.0512 | 0.0292  | 0.0384  | 0.0330  | -0.0536 | 0.0198 | 0.0000 |

**Table S5.** The effective population sizes for each population based on *COI* and *D-Loop* sequences.

| Population | <i>COI</i> | <i>D-Loop</i> |
|------------|------------|---------------|
| MA         | 82784000   | 127069000     |
| ZJS        | 84495000   | 79514000      |
| HA         | 40708000   | 60300000      |
| DT         | 90766000   | 103192000     |
| NJLD       | 41633000   | 106242000     |
| FYLD       | 2477000    | 108329000     |
| PT         | 88047000   | 119829000     |
| MZD        | 2060000    | 15060000      |
| CW         | 100252000  | 142173000     |
| XM         | 11573000   | 102886000     |
| QA         | 115895000  | 132202000     |
| DH         | 80819000   | 130186000     |
| JH         | 39004000   | 115484000     |
| DZG        | 34860000   | 98923000      |
| SYH        | 40811000   | 4266000       |

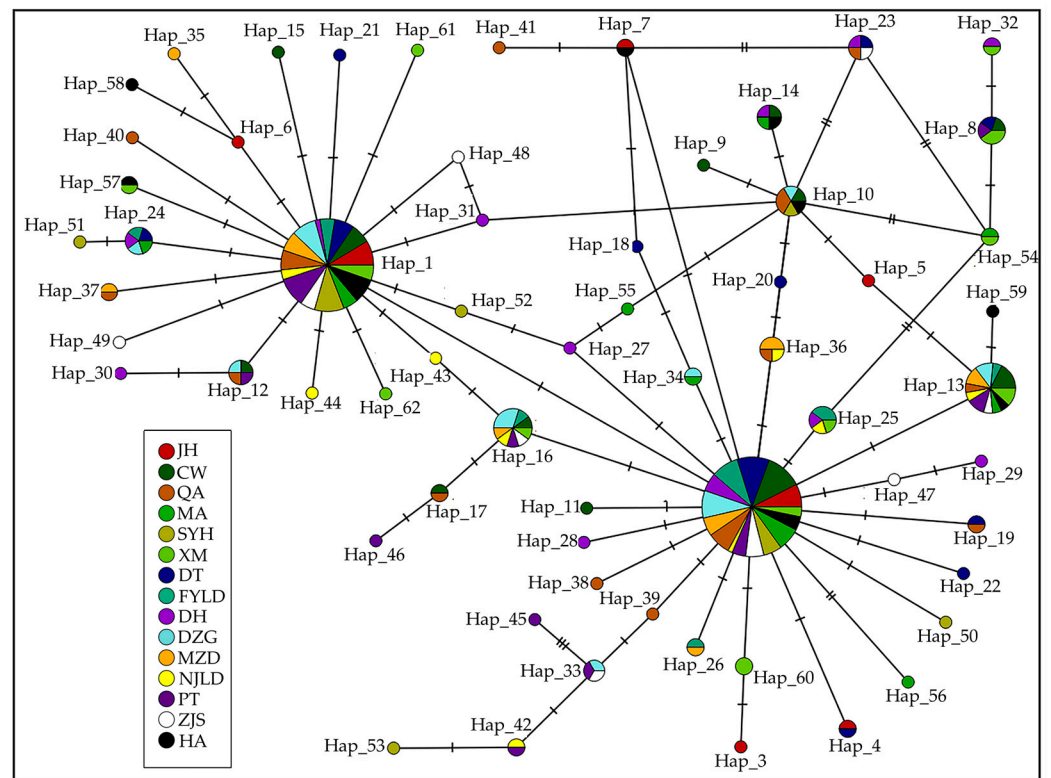

**Figure S1.** The minimum spanning network based on *COI* sequences.

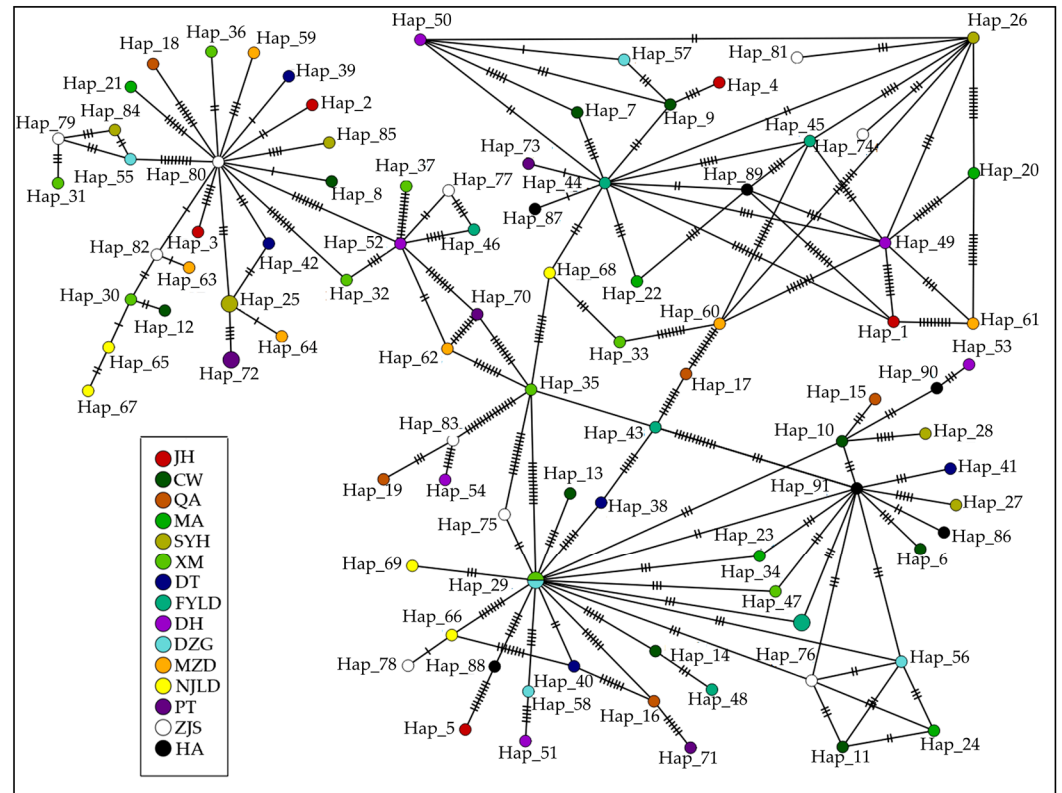

**Figure S2.** The minimum spanning network based on *D-Loop* sequences.
